# Supplementary material for: Rapid Support for Older Adults during the Initial Stages of the COVID-19 Pandemic: Results from a Geriatric Psychiatry Helpline
Source: MDPI journal article supplement (doi:10.3390/geriatrics6010030), 2021-03-22
Supplement: s1 [file s1]

**Supplementary Table 1.** Skewness and Kurtosis for mental health variables of depression and anxiety. SE Standard Error. Both variables were sufficiently normally distributed.

|            | Skewness |        |       | Kurtosis |       |
|------------|----------|--------|-------|----------|-------|
|            | N        | Value  | SE    | Value    | SE    |
| Anxiety    | 35       | -0.058 | 0.398 | -1.271   | 0.778 |
| Depression | 44       | 0.293  | 0.357 | -0.908   | 0.702 |

SD= Standard deviation. SE= Standard error

**Supplementary Table 2.** Table depicting the different features of help provided and subsequent appointments scheduled by us for psychiatric or psychotherapeutic counseling or support by our social worker. Total N represents the number of callers which participated in the survey. N responded= the number of callers which were willing to answer the question. N represents the number of callers which affirmed the specific information and features asked. The percentage was calculated as (N/N responded)\*100.

|                                                      | N or M (SD) | (%)  |
|------------------------------------------------------|-------------|------|
| <b>Result of the helpline call (N responded= 51)</b> |             |      |
| Providing information of Covid-19                    | 30          | 58.8 |
| Practical help/information for daily living          | 1           | 1.9  |
| Providing social contacts                            | 1           | 1.9  |
| Providing help for somatic diseases/issues           | 7           | 13.7 |
| Recommendation for psychiatric counseling            | 15          | 29.4 |
| Providing relieving psychological support            | 29          | 56.9 |
| Providing contact to welfare work                    | 1           | 1.9  |
| <b>Subsequent treatments (N responded= 51)</b>       |             |      |
| No subsequent treatments                             | 38          | 74.5 |
| Subsequent treatments required                       | 10          | 19.6 |
| Subsequent psychiatric treatment provided            | 3           | 5.9  |
| Subsequent psychotherapy provided                    | 7           | 13.7 |
| Subsequent welfare work provided                     | 1           | 1.9  |
